# Supplementary material for: Time-resolved gas-phase kinetic study of the germylene addition reaction, GeH2 + CH3CCCH3
Source: Royal Society of Chemistry journal article supplement (doi:10.1039/b821330e), 2009-01-01
Supplement: b821330e.pdf [file b821330e.pdf]

## Supplementary Information

### Time-resolved gas-phase kinetic study of the germylene addition reaction, $\text{GeH}_2 + \text{CH}_3\text{C}\equiv\text{CCH}_3$

Rosa Becerra and Robin Walsh

#### Calculation of the enthalpies of products and transition states in the reaction of $\text{GeH}_2$ with $\text{CH}_3\text{C}\equiv\text{CCH}_3$

This was done using an additivity method based on the reactions:

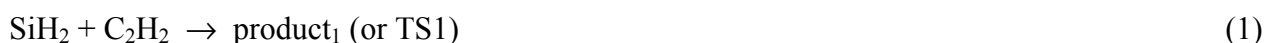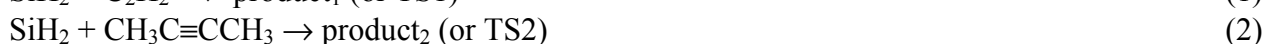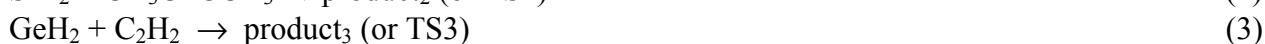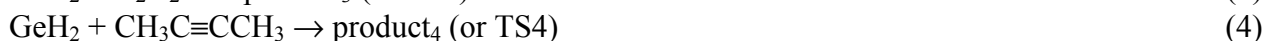

Values for  $\Delta H^\circ(4)$  were derived using equation (5):

$$\Delta H^\circ(4) = \Delta H^\circ(3) + \Delta H^\circ(2) - \Delta H^\circ(1) \quad (5)$$

This assumes bond additivity, but is a close approximation to group additivity<sup>s1</sup>. Equation (5) was used as is, for derivation of  $\Delta H^\circ(4)$  values in Tables S1a-S1e and S2b-S2d. For  $\Delta H^\circ(4)$  values in Tables S1f and S2a, the further group correction incorporated into equation (6) was applied.

$$\Delta H^\circ(4) = \Delta H^\circ(3) + \Delta H^\circ(2) - \Delta H^\circ(1) + \Delta H^\circ([\text{Ge}_-(\text{C})_2(\text{H})_2]) - [\text{Ge}_-(\text{C})(\text{H})_3] - [\text{Si}_-(\text{C})_2(\text{H})_2] + [\text{Si}_-(\text{C})(\text{H})_3] \quad (6)$$

The additional bracketed quantity in (6) has the value of + 17 kJ mol<sup>-1</sup> s2,s3.

Tables of  $\Delta H^\circ$  values are given on p.2 (Tables S1a-S1d), p.3 (Tables S1e, S1f, S2a, S2b) and p.4 (Tables S2c, S2d). References are given on p.5.

#### Calculation of LJ collision number for $\text{GeH}_2 + \text{CH}_3\text{C}\equiv\text{CCH}_3$

This was done by the method recommended by Troe<sup>s7</sup>. The LJ parameters for  $\text{GeH}_2$  were taken to be the same as those for  $\text{GeH}_4$ , as used previously<sup>s8</sup>. The LJ parameters for  $\text{CH}_3\text{C}\equiv\text{CCH}_3$  were obtained by extrapolation of those for  $\text{C}_2\text{H}_2$  and  $\text{CH}_3\text{C}\equiv\text{CH}$ <sup>s9</sup>. The parameters themselves are given in Table S3 (p.4). References are given on p.5.

**Table S1a** Data for derivation of standard enthalpy at 298 K of reaction:  
 $\text{GeH}_2 + \text{CH}_3\text{C}\equiv\text{CCH}_3 \rightarrow 2,3\text{-dimethylgermirene}$ .

| Reaction                                                                                        | $\Delta H^\circ/\text{kJ mol}^{-1}$ | Method     | Reference |
|-------------------------------------------------------------------------------------------------|-------------------------------------|------------|-----------|
| $\text{SiH}_2 + \text{C}_2\text{H}_2 \rightarrow \text{silirene}$                               | -218                                | G3         | s4        |
| $\text{SiH}_2 + \text{CH}_3\text{C}\equiv\text{CCH}_3 \rightarrow 2,3\text{-dimethylsilirene}$  | -216                                | G3         | s5        |
| $\text{GeH}_2 + \text{C}_2\text{H}_2 \rightarrow \text{germirene}$                              | -107                                | G2//QCISD  | s6        |
| $\text{GeH}_2 + \text{CH}_3\text{C}\equiv\text{CCH}_3 \rightarrow 2,3\text{-dimethylgermirene}$ | -105                                | Additivity | derived   |

**Table S1b** Data for derivation of standard enthalpy at 298 K of reaction:  
 $\text{GeH}_2 + \text{CH}_3\text{C}\equiv\text{CCH}_3 \rightarrow \text{HGeCMe}=\text{CHMe}(\text{cis})$ .

| Reaction                                                                                                 | $\Delta H^\circ/\text{kJ mol}^{-1}$ | Method     | Reference |
|----------------------------------------------------------------------------------------------------------|-------------------------------------|------------|-----------|
| $\text{SiH}_2 + \text{C}_2\text{H}_2 \rightarrow \text{HSiCH}=\text{CH}_2$                               | -186                                | G3         | s4        |
| $\text{SiH}_2 + \text{CH}_3\text{C}\equiv\text{CCH}_3 \rightarrow \text{HSiCMe}=\text{CHMe}(\text{cis})$ | -167                                | G3         | s5        |
| $\text{GeH}_2 + \text{C}_2\text{H}_2 \rightarrow \text{HGeCH}=\text{CH}_2$                               | -166                                | G2//QCISD  | s6        |
| $\text{GeH}_2 + \text{CH}_3\text{C}\equiv\text{CCH}_3 \rightarrow \text{HGeCMe}=\text{CHMe}(\text{cis})$ | -147                                | Additivity | derived   |

**Table S1c** Data for derivation of standard enthalpy at 298 K of reaction:  
 $\text{GeH}_2 + \text{CH}_3\text{C}\equiv\text{CCH}_3 \rightarrow \text{EtC}(\text{Me})=\text{Ge}$ .

| Reaction                                                                                           | $\Delta H^\circ/\text{kJ mol}^{-1}$ | Method     | Reference |
|----------------------------------------------------------------------------------------------------|-------------------------------------|------------|-----------|
| $\text{SiH}_2 + \text{C}_2\text{H}_2 \rightarrow \text{CH}_3\text{CH}=\text{Si}$                   | -192                                | G3         | s4        |
| $\text{SiH}_2 + \text{CH}_3\text{C}\equiv\text{CCH}_3 \rightarrow \text{EtC}(\text{Me})=\text{Si}$ | -158                                | G3         | s5        |
| $\text{GeH}_2 + \text{C}_2\text{H}_2 \rightarrow \text{CH}_3\text{CH}=\text{Ge}$                   | -172                                | G2//QCISD  | s6        |
| $\text{GeH}_2 + \text{CH}_3\text{C}\equiv\text{CCH}_3 \rightarrow \text{EtC}(\text{Me})=\text{Ge}$ | -138                                | Additivity | derived   |

**Table S1d** Data for derivation of standard enthalpy at 298 K of reaction:  
 $\text{GeH}_2 + \text{CH}_3\text{C}\equiv\text{CCH}_3 \rightarrow 2,3\text{-dimethylgermiranylidene}$ .

| Reaction                                                                                              | $\Delta H^\circ/\text{kJ mol}^{-1}$ | Method     | Reference |
|-------------------------------------------------------------------------------------------------------|-------------------------------------|------------|-----------|
| $\text{SiH}_2 + \text{C}_2\text{H}_2 \rightarrow \text{siliranylidene}$                               | -203                                | G3         | s4        |
| $\text{SiH}_2 + \text{CH}_3\text{C}\equiv\text{CCH}_3 \rightarrow 2,3\text{-dimethylsiliranylidene}$  | -158                                | G3         | s5        |
| $\text{GeH}_2 + \text{C}_2\text{H}_2 \rightarrow \text{germiranylidene}$                              | -183                                | G2//QCISD  | s6        |
| $\text{GeH}_2 + \text{CH}_3\text{C}\equiv\text{CCH}_3 \rightarrow 2,3\text{-dimethylgermiranylidene}$ | -138                                | Additivity | derived   |

**Table S1e** Data for derivation of standard enthalpy at 298 K of reaction:  
 $\text{GeH}_2 + \text{CH}_3\text{C}\equiv\text{CCH}_3 \rightarrow \text{Ge}({}^3\text{P}_1) + \text{trans-2-butene}$ .

| Reaction                                                                                                             | $\Delta H^\circ/\text{kJ mol}^{-1}$ | Method     | Reference |
|----------------------------------------------------------------------------------------------------------------------|-------------------------------------|------------|-----------|
| $\text{SiH}_2 + \text{C}_2\text{H}_2 \rightarrow \text{Si}({}^3\text{P}_1) + \text{C}_2\text{H}_4$                   | +7                                  | G3         | s4        |
| $\text{SiH}_2 + \text{CH}_3\text{C}\equiv\text{CCH}_3 \rightarrow \text{Si}({}^3\text{P}_1) + \text{trans-2-butene}$ | +27                                 | G3         | s5        |
| $\text{GeH}_2 + \text{C}_2\text{H}_2 \rightarrow \text{Ge}({}^3\text{P}_1) + \text{C}_2\text{H}_4$                   | -37                                 | G2//QCISD  | s6        |
| $\text{GeH}_2 + \text{CH}_3\text{C}\equiv\text{CCH}_3 \rightarrow \text{Ge}({}^3\text{P}_1) + \text{trans-2-butene}$ | -17                                 | Additivity | derived   |

**Table S1f** Data for derivation of standard enthalpy at 298 K of reaction:  
 $\text{GeH}_2 + \text{CH}_3\text{C}\equiv\text{CCH}_3 \rightarrow \text{MeC}\equiv\text{CGeH}_2\text{Me}$ .

| Reaction                                                                                                  | $\Delta H^\circ/\text{kJ mol}^{-1}$ | Method     | Reference |
|-----------------------------------------------------------------------------------------------------------|-------------------------------------|------------|-----------|
| $\text{SiH}_2 + \text{C}_2\text{H}_2 \rightarrow \text{HC}\equiv\text{CSiH}_3$                            | -261                                | G3         | s4        |
| $\text{SiH}_2 + \text{CH}_3\text{C}\equiv\text{CCH}_3 \rightarrow \text{MeC}\equiv\text{CSiH}_2\text{Me}$ | -294                                | G3         | s5        |
| $\text{GeH}_2 + \text{C}_2\text{H}_2 \rightarrow \text{HC}\equiv\text{CGeH}_3$                            | -170                                | G2//QCISD  | s6        |
| $\text{GeH}_2 + \text{CH}_3\text{C}\equiv\text{CCH}_3 \rightarrow \text{MeC}\equiv\text{CGeH}_2\text{Me}$ | -186                                | Additivity | derived   |

**Table S2a** Data for derivation of standard enthalpy at 298 K of the transition state for the reaction: 2,3-dimethylgermirene  $\rightarrow$   $\text{MeC}\equiv\text{CGeH}_2\text{Me}$ .

| Reaction                                                                     | $\Delta H_{\text{rel}}^\circ/\text{kJ mol}^{-1 a}$ | Method     | Reference |
|------------------------------------------------------------------------------|----------------------------------------------------|------------|-----------|
| silirene $\rightarrow$ $\text{HC}\equiv\text{CSiH}_3$                        | -41                                                | G3         | s4        |
| 2,3-dimethylsilirene $\rightarrow$ $\text{MeC}\equiv\text{CSiH}_2\text{Me}$  | +66                                                | G3         | s5        |
| germirene $\rightarrow$ $\text{HC}\equiv\text{CGeH}_3$                       | +47                                                | G2//QCISD  | s6        |
| 2,3-dimethylgermirene $\rightarrow$ $\text{MeC}\equiv\text{CGeH}_2\text{Me}$ | +171                                               | Additivity | derived   |

<sup>a</sup>Relative to  $\text{SiH}_2$  (or  $\text{GeH}_2$ ) +  $\text{C}_2\text{H}_2$  (or  $\text{CH}_3\text{C}\equiv\text{CCH}_3$ )

**Table S2b** Data for derivation of standard enthalpy at 298 K of the transition state for the reaction: 2,3-dimethylgermirene  $\rightarrow$   $\text{HGeCMe}=\text{CHMe}(\text{cis})$ .

| Reaction                                                                    | $\Delta H_{\text{rel}}^\circ/\text{kJ mol}^{-1 a}$ | Method     | Reference |
|-----------------------------------------------------------------------------|----------------------------------------------------|------------|-----------|
| silirene $\rightarrow$ $\text{HSiCH}=\text{CH}_2$                           | -65                                                | G3         | s4        |
| 2,3-dimethylsilirene $\rightarrow$ $\text{HSiCMe}=\text{CHMe}(\text{cis})$  | -76                                                | G3         | s5        |
| germirene $\rightarrow$ $\text{HGeCH}=\text{CH}_2$                          | -26                                                | G2//QCISD  | s6        |
| 2,3-dimethylgermirene $\rightarrow$ $\text{HGeCMe}=\text{CHMe}(\text{cis})$ | -37                                                | Additivity | derived   |

<sup>a</sup>Relative to  $\text{SiH}_2$  (or  $\text{GeH}_2$ ) +  $\text{C}_2\text{H}_2$  (or  $\text{CH}_3\text{C}\equiv\text{CCH}_3$ )

**Table S2c** Data for derivation of standard enthalpy at 298 K of the transition state for the reaction:  $\text{HGeCMe=CHMe(cis)} \rightarrow \text{EtC(Me)=Ge}$ .

| Reaction                                                | $\Delta H_{\text{rel}}^{\circ}/\text{kJ mol}^{-1 a}$ | Method     | Reference |
|---------------------------------------------------------|------------------------------------------------------|------------|-----------|
| $\text{HSiCH=CH}_2 \rightarrow \text{CH}_3\text{CH=Si}$ | -78                                                  | G3         | s4        |
| $\text{HSiCMe=CHMe(cis)} \rightarrow \text{EtC(Me)=Si}$ | -73                                                  | G3         | s5        |
| $\text{HGeCH=CH}_2 \rightarrow \text{CH}_3\text{CH=Ge}$ | -49                                                  | G2//QCISD  | s6        |
| $\text{HGeCMe=CHMe(cis)} \rightarrow \text{EtC(Me)=Ge}$ | -44                                                  | Additivity | derived   |

<sup>a</sup>Relative to  $\text{SiH}_2$  (or  $\text{GeH}_2$ ) +  $\text{C}_2\text{H}_2$  (or  $\text{CH}_3\text{C}\equiv\text{CCH}_3$ )

**Table S2d** Data for derivation of standard enthalpy at 298 K of the transition state for the reaction:  $\text{HGeCMe=CHMe(cis)} \rightarrow 2,3\text{-dimethylgermiranylidene(cis)}$ .

| Reaction                                                                      | $\Delta H_{\text{rel}}^{\circ}/\text{kJ mol}^{-1 a}$ | Method     | Ref.    |
|-------------------------------------------------------------------------------|------------------------------------------------------|------------|---------|
| $\text{HSiCH=CH}_2 \rightarrow \text{siliranylidene}$                         | -80                                                  | G3         | s4      |
| $\text{HSiCMe=CHMe(cis)} \rightarrow 2,3\text{-dimethylsiliranylidene(cis)}$  | -67                                                  | G3         | s5      |
| $\text{HGeCH=CH}_2 \rightarrow \text{germiranylidene}$                        | +8                                                   | G2//QCISD  | s6      |
| $\text{HGeCMe=CHMe(cis)} \rightarrow 2,3\text{-dimethylgermiranylidene(cis)}$ | +21                                                  | Additivity | derived |

<sup>a</sup>Relative to  $\text{SiH}_2$  (or  $\text{GeH}_2$ ) +  $\text{C}_2\text{H}_2$  (or  $\text{CH}_3\text{C}\equiv\text{CCH}_3$ )

**Table S3** Lennard-Jones Parameters for  $\text{GeH}_2$  and  $\text{CH}_3\text{C}\equiv\text{CCH}_3$ .

| Molecule                                  | $\sigma/\text{\AA}$ | $(\epsilon/k)/\text{K}$ |
|-------------------------------------------|---------------------|-------------------------|
| $\text{GeH}_2^a$                          | 4.22                | 239                     |
| $\text{CH}_3\text{C}\equiv\text{CCH}_3^b$ | 5.18                | 317                     |

<sup>a</sup>See text and ref s8. <sup>b</sup>See text and ref s9.

## References

- s1. S. W. Benson, F. R. Cruickshank, D. M. Golden, G. R. Haugen, H. E. O'Neal, A. S. Rodgers, R. Shaw and R. Walsh, *Chem. Rev.*, 1969, **69**, 279.
- s2. R. Becerra and R. Walsh, Thermochemistry. In *The Chemistry of Organic Silicon Compounds*; Z. Rappoport and Y. Apeloig, Y., Eds.; Wiley: Chichester, 1998; Vol. 2, Chapter 4, p 153.
- s3. J. A. Martinho-Simões, J. F. Liebman and S. W. Slayden, in *The Chemistry of Organic Germanium, Tin and Lead Compounds*, S. Patai, ed., Wiley, Chichester, 1995, Chap. 4, p. 245.
- s4. R. Becerra, J. P. Cannady, G. Dormer and R. Walsh, *J. Phys. Chem. A*, 2008, **112**, 8665.
- s5. R. Becerra, J. P. Cannady, G. Dormer and R. Walsh, *Phys. Chem. Chem. Phys.*, 2008, **10**, submitted.
- s6. R. Becerra, S.E. Boganov, M.P. Egorov, V.I. Faustov, I. V. Krylova, O.M. Nefedov, V.M. Promyslov and R. Walsh, *Phys. Chem. Chem. Phys.*, 2004, **6**, 3370.
- s7. J. Troe, *J. Chem. Phys.*, 1977, **66**, 4758.
- s8. R. Becerra, S. Boganov and R. Walsh, *J. Chem. Soc., Faraday Trans.*, 1998, **94**, 3569.
- s9. R. C. Reid, J. M. Prausnitz and B. E. Poling, *The properties of gases and liquids*, 4<sup>th</sup> edn., McGraw-Hill, New York, 1988.
